# Supplementary material for: Advances in Bovine Coronavirus Epidemiology
Source: MDPI journal article supplement (doi:10.3390/v14051109), 2022-05-21
Supplement: s1 [file s1]

**Table S1** The reference BCoV strains used in this study.

| Strain name                                 | Countries | Collecti<br>on date | GenBank accession no. |
|---------------------------------------------|-----------|---------------------|-----------------------|
| Kakegawa                                    | Japan     | 1976                | AB354579.1            |
| LY-138                                      | USA       | 1965                | AF058942.1            |
| LSU-94LSS-051-2                             | USA       | 1994                | AF058943.1            |
| OK-0514-3                                   | USA       | 1996                | AF058944.1            |
| Quebec                                      | Canada    | 1972                | AF220295.1            |
| BCoV-ENT                                    | USA       | 1998                | AF391541.1            |
| BCoV-LUN                                    | USA       | 1998                | AF391542.1            |
| KWD1                                        | Korea     | 2002                | AY935637.1            |
| KWD2                                        | Korea     | 2002                | AY935638.1            |
| KWD3                                        | Korea     | 2002                | AY935639.1            |
| KWD4                                        | Korea     | 2002                | AY935640.1            |
| KWD5                                        | Korea     | 2002                | AY935641.1            |
| KWD6                                        | Korea     | 2002                | AY935642.1            |
| KWD7                                        | Korea     | 2002                | AY935643.1            |
| KWD8                                        | Korea     | 2002                | AY935644.1            |
| KWD9                                        | Korea     | 2002                | AY935645.1            |
| KWD10                                       | Korea     | 2002                | AY935646.1            |
| F15                                         | France    | 1979                | D00731.1              |
| KCD1                                        | Korea     | 2004                | DQ389632.1            |
| KCD2                                        | Korea     | 2004                | DQ389633.1            |
| KCD3                                        | Korea     | 2004                | DQ389634.1            |
| KCD4                                        | Korea     | 2004                | DQ389635.1            |
| KCD5                                        | Korea     | 2004                | DQ389636.1            |
| KCD6                                        | Korea     | 2004                | DQ389637.1            |
| KCD7                                        | Korea     | 2004                | DQ389638.1            |
| KCD8                                        | Korea     | 2004                | DQ389639.1            |
| KCD9                                        | Korea     | 2004                | DQ389640.1            |
| KCD10                                       | Korea     | 2004                | DQ389641.1            |
| KWD11                                       | Korea     | 2002                | DQ389652.1            |
| KWD12                                       | Korea     | 2002                | DQ389653.1            |
| KWD13                                       | Korea     | 2002                | DQ389654.1            |
| KWD14                                       | Korea     | 2002                | DQ389655.1            |
| KWD15                                       | Korea     | 2002                | DQ389656.1            |
| KWD16                                       | Korea     | 2002                | DQ389657.1            |
| KWD17                                       | Korea     | 2002                | DQ389658.1            |
| KWD18                                       | Korea     | 2002                | DQ389659.1            |
| KWD19                                       | Korea     | 2002                | DQ389660.1            |
| Alpaca                                      | USA       | 1998                | DQ915164.2            |
| Sable_antelope_coronavirus_US/OH1/2003      | USA       | 2003                | EF424621.1            |
| Giraffe_coronavirus_US/OH3/2003             | USA       | 2003                | EF424623.1            |
| Calf-giraffe_coronavirus_US/OH3/2006        | USA       | 2006                | EF424624.1            |
| Human_enteric_coronavirus_4408              | Germany   | 1988                | FJ415324.1            |
| DB2                                         | Germany   | 1983                | DQ811784.2            |
| W17-18/R/2017                               | Korea     | 2017                | MG518518.1            |
| Waterbuck_coronavirus_US/OH-WD358           | USA       | 1994                | FJ425186.1            |
| White-tailed_deer_coronavirus_US/OH-WD470   | USA       | 1994                | FJ425187.1            |
| Human_enteric_coronavirus_strain_4408       | USA       | 2009                | FJ938067.1            |
| Canine_respiratory_coronavirus_strain_BJ232 | China     | 2014                | KX432213.1            |
| E-AH187                                     | USA       | 2000                | EF424619.1            |
| R-AH187                                     | USA       | 2000                | EF424620.1            |
| Bovine coronavirus E-AH65                   | USA       | 2007                | EF424615.1            |
| 339/06                                      | Italy     | 2006                | EF445634.1            |
| Bubalus/Italy/179/07-11                     | Italy     | 2007                | EU019216.1            |
| 438/06-TN                                   | Italy     | 2006                | EU814647.1            |
| 438/06-TN-50                                | Italy     | 2006                | EU814648.1            |
| Wisent 10/01                                | Korea     | 2010                | HM573326.1            |

|                           |         |      |            |
|---------------------------|---------|------|------------|
| Tahr1 10/01               | Korea   | 2010 | HM573327.1 |
| Tahr2 10/01               | Korea   | 2010 | HM573328.1 |
| Sitatunga 10/01           | Korea   | 2010 | HM573329.1 |
| Nyala 10/01               | Korea   | 2010 | HM573330.1 |
| SWE/C/92                  | Sweden  | 1992 | KF169908.1 |
| SWE/02-1                  | Sweden  | 2002 | KF169909.1 |
| SWE/02-2                  | Sweden  | 2002 | KF169910.1 |
| SWE/02-3                  | Sweden  | 2002 | KF169911.1 |
| SWE/02-4                  | Sweden  | 2002 | KF169912.1 |
| DEN/03-1                  | Denmark | 2003 | KF169913.1 |
| DEN/03-2                  | Denmark | 2003 | KF169914.1 |
| DEN/03-3                  | Denmark | 2003 | KF169915.1 |
| DEN/05-1                  | Denmark | 2005 | KF169916.1 |
| DEN/05-2                  | Denmark | 2005 | KF169917.1 |
| DEN/05-3                  | Denmark | 2005 | KF169918.1 |
| DEN/05-4                  | Denmark | 2005 | KF169919.1 |
| SWE/N/05-1                | Sweden  | 2005 | KF169920.1 |
| SWE/N/05-2                | Sweden  | 2005 | KF169921.1 |
| SWE/AC/06-1               | Sweden  | 2006 | KF169922.1 |
| SWE/M/06-3                | Sweden  | 2006 | KF169923.1 |
| SWE/M/06-4                | Sweden  | 2006 | KF169924.1 |
| SWE/Z/07-1                | Sweden  | 2007 | KF169925.1 |
| SWE/C/07-2                | Sweden  | 2007 | KF169926.1 |
| SWE/I/07-3                | Sweden  | 2007 | KF169927.1 |
| SWE/I/07-4                | Sweden  | 2007 | KF169928.1 |
| SWE/I/07-5                | Sweden  | 2007 | KF169929.1 |
| SWE/C/07-6                | Sweden  | 2007 | KF169930.1 |
| SWE/AC/08-1               | Sweden  | 2008 | KF169931.1 |
| SWE/C/08-2                | Sweden  | 2008 | KF169932.1 |
| SWE/I/08-3                | Sweden  | 2008 | KF169933.1 |
| SWE/P/09-1                | Sweden  | 2009 | KF169934.1 |
| SWE/C/09-2                | Sweden  | 2009 | KF169935.1 |
| SWE/U/09-3                | Sweden  | 2009 | KF169936.1 |
| SWE/M/10-1                | Sweden  | 2010 | KF169937.1 |
| SWE/M/10-2                | Sweden  | 2010 | KF169938.1 |
| SWE/Y/10-3                | Sweden  | 2010 | KF169939.1 |
| SWE/P/10-4                | Sweden  | 2010 | KF169940.1 |
| HLJ-14/CHN                | China   | 2014 | KM985631.1 |
| BCoV/FRA/EPI/Caen/2005/01 | France  | 2003 | KT318111.1 |
| BCoV/FRA/EPI/Caen/2005/02 | France  | 2005 | KT318112.1 |
| BCoV/FRA/EPI/Caen/2008/04 | France  | 2008 | KT318114.1 |
| BCoV/FRA/EPI/Caen/2003/05 | France  | 2003 | KT318115.1 |
| BCoV/FRA/EPI/Caen/2010/06 | France  | 2010 | KT318116.1 |
| BCoV/FRA/EPI/Caen/2012/07 | France  | 2012 | KT318117.1 |
| BCoV/FRA/EPI/Caen/2013/08 | France  | 2013 | KT318118.1 |
| BCoV/FRA/EPI/Caen/2013/09 | France  | 2013 | KT318119.1 |
| BCoV/FRA/EPI/Caen/2013/10 | France  | 2013 | KT318120.1 |
| BCoV/FRA/EPI/Caen/2013/11 | France  | 2013 | KT318121.1 |
| BCoV/FRA/EPI/Caen/2014/12 | France  | 2014 | KT318122.1 |
| BCoV/FRA/EPI/Caen/2014/13 | France  | 2014 | KT318123.1 |
| BCoV/FRA/EPI/Caen/2004/14 | France  | 2004 | KT318124.1 |
| BCV-AKS-01                | China   | 2015 | KU886219.1 |
| BCoV_2014_13              | France  | 2014 | KX982264.1 |
| GIF-1                     | Japan   | 2016 | LC494126.1 |
| IWT-9                     | Japan   | 2012 | LC494127.1 |
| IWT-10                    | Japan   | 2012 | LC494128.1 |
| IWT-1                     | Japan   | 2010 | LC494129.1 |
| IWT-2                     | Japan   | 2010 | LC494130.1 |
| IWT-3                     | Japan   | 2011 | LC494131.1 |
| IWT-4                     | Japan   | 2011 | LC494132.1 |
| IWT-5                     | Japan   | 2011 | LC494133.1 |

|            |        |      |            |
|------------|--------|------|------------|
| IWT-6      | Japan  | 2011 | LC494134.1 |
| IWT-7      | Japan  | 2012 | LC494135.1 |
| IWT-8      | Japan  | 2012 | LC494136.1 |
| IWT-11     | Japan  | 2013 | LC494137.1 |
| IWT-12     | Japan  | 2015 | LC494138.1 |
| IWT-13     | Japan  | 2015 | LC494139.1 |
| IWT-14     | Japan  | 2015 | LC494140.1 |
| IWT-15     | Japan  | 2016 | LC494141.1 |
| IWT-18     | Japan  | 2016 | LC494142.1 |
| IWT-19     | Japan  | 2016 | LC494143.1 |
| IWT-20     | Japan  | 2016 | LC494144.1 |
| IWT-21     | Japan  | 2016 | LC494145.1 |
| IWT-16     | Japan  | 2016 | LC494146.1 |
| IWT-17     | Japan  | 2016 | LC494147.1 |
| IWT-22     | Japan  | 2016 | LC494148.1 |
| IWT-23     | Japan  | 2016 | LC494149.1 |
| IWT-24     | Japan  | 2017 | LC494150.1 |
| IWT-25     | Japan  | 2017 | LC494151.1 |
| IWT-26     | Japan  | 2017 | LC494152.1 |
| IWT-27     | Japan  | 2017 | LC494153.1 |
| SHG-1      | Japan  | 2014 | LC494154.1 |
| SHG-2      | Japan  | 2014 | LC494155.1 |
| SHG-3      | Japan  | 2014 | LC494156.1 |
| SHG-4      | Japan  | 2015 | LC494157.1 |
| SHG-5      | Japan  | 2016 | LC494158.1 |
| SHG-6      | Japan  | 2017 | LC494159.1 |
| TCG-4      | Japan  | 2007 | LC494160.1 |
| TCG-5      | Japan  | 2007 | LC494161.1 |
| TCG-3      | Japan  | 2006 | LC494162.1 |
| TCG-2      | Japan  | 2006 | LC494163.1 |
| TCG-1      | Japan  | 2006 | LC494164.1 |
| TCG-10     | Japan  | 2008 | LC494165.1 |
| TCG-11     | Japan  | 2008 | LC494166.1 |
| TCG-12     | Japan  | 2008 | LC494167.1 |
| TCG-13     | Japan  | 2009 | LC494168.1 |
| TCG-14     | Japan  | 2009 | LC494169.1 |
| TCG-15     | Japan  | 2010 | LC494170.1 |
| TCG-16     | Japan  | 2010 | LC494171.1 |
| TCG-6      | Japan  | 2007 | LC494172.1 |
| TCG-7      | Japan  | 2008 | LC494173.1 |
| TCG-8      | Japan  | 2008 | LC494174.1 |
| TCG-18     | Japan  | 2016 | LC494175.1 |
| TCG-17     | Japan  | 2016 | LC494176.1 |
| TCG-9      | Japan  | 2008 | LC494177.1 |
| TCG-19     | Japan  | 2016 | LC494178.1 |
| TCG-20     | Japan  | 2016 | LC494179.1 |
| TCG-21     | Japan  | 2016 | LC494180.1 |
| TCG-22     | Japan  | 2016 | LC494181.1 |
| TCG-23     | Japan  | 2016 | LC494182.1 |
| TCG-24     | Japan  | 2017 | LC494183.1 |
| TCG-25     | Japan  | 2017 | LC494184.1 |
| TCG-26     | Japan  | 2017 | LC494185.1 |
| TCG-27     | Japan  | 2017 | LC494186.1 |
| TCG-28     | Japan  | 2017 | LC494187.1 |
| TCG-29     | Japan  | 2017 | LC494188.1 |
| TCG-30     | Japan  | 2017 | LC494189.1 |
| TCG-31     | Japan  | 2017 | LC494190.1 |
| TCG-32     | Japan  | 2017 | LC494191.1 |
| TCG-33     | Japan  | 2017 | LC494192.1 |
| ICSA21-LBA | France | 2014 | MG757138.1 |
| ICSA16-EN  | France | 2014 | MG757139.1 |

|                          |         |      |               |
|--------------------------|---------|------|---------------|
| ICSA16-LBA               | France  | 2014 | MG757140.1    |
| ICSA-pool-EN             | France  | 2014 | MG757141.1    |
| ICSA-pool-LBA            | France  | 2014 | MG757142.1    |
| ICSA4-EN                 | France  | 2014 | MG757143.1    |
| ICSA17-LBA               | France  | 2014 | MG757144.1    |
| 4-17-03                  | USA     | 2017 | MH043952.1    |
| 4-17-25                  | USA     | 2017 | MH043953.1    |
| 4-17-08                  | USA     | 2017 | MH043954.1    |
| 7-16-23                  | USA     | 2016 | MH043955.1    |
| PL84                     | Vietnam | 2017 | MH197037.1    |
| PL83                     | Vietnam | 2017 | MH197038.1    |
| ND65                     | Vietnam | 2017 | MH197039.1    |
| DT97                     | Vietnam | 2017 | MH203064.1    |
| BL104                    | Vietnam | 2017 | MH203065.1    |
| MC199                    | Vietnam | 2017 | MH203066.1    |
| VP200                    | Vietnam | 2017 | MH203067.1    |
| Yak/HY24                 | China   | 2017 | MH741424.1    |
| QH1                      | China   | 2017 | MH810151.1    |
| QH2                      | China   | 2017 | MH810152.1    |
| QH3                      | China   | 2017 | MH810153.1    |
| SC1                      | China   | 2017 | MH810154.1    |
| SC2                      | China   | 2017 | MH810155.1    |
| SC3                      | China   | 2017 | MH810156.1    |
| XZ1                      | China   | 2017 | MH810157.1    |
| XZ2                      | China   | 2017 | MH810158.1    |
| XZ3                      | China   | 2017 | MH810159.1    |
| YN1                      | China   | 2017 | MH810160.1    |
| YN2                      | China   | 2017 | MH810161.1    |
| YN3                      | China   | 2017 | MH810162.1    |
| HY24                     | China   | 2017 | MH810163.1    |
| BCOV-China/SWUN/SC1/2017 | China   | 2017 | MK095174.1    |
| BCOV-China/SWUN/SC2/2017 | China   | 2017 | MK095175.1    |
| BCOV-China/SWUN/SC3/2017 | China   | 2017 | MK095176.1    |
| BCOV-China/SWUN/SX1/2018 | China   | 2018 | MK095177.1    |
| BCOV-China/SWUN/SX2/2018 | China   | 2018 | MK095178.1    |
| BCOV-China/SWUN/LN1/2018 | China   | 2018 | MK095179.1    |
| BCOV-China/SWUN/LN2/2018 | China   | 2018 | MK095180.1    |
| BCOV-China/SWUN/LN3/2018 | China   | 2018 | MK095181.1    |
| BCOV-China/SWUN/LN4/2018 | China   | 2018 | MK095182.1    |
| BCOV-China/SWUN/LN5/2018 | China   | 2018 | MK095183.1    |
| BCOV-China/SWUN/HN1/2018 | China   | 2018 | MK095184.1    |
| BCOV-China/SWUN/HN2/2018 | China   | 2018 | MK095185.1    |
| BCOV-China/SWUN/HN3/2018 | China   | 2018 | MK095186.1    |
| BCOV-China/SWUN/A10/2018 | China   | 2018 | MN982199.1    |
| BCOV-China/SWUN/A1/2018  | China   | 2018 | MN982198.1/ / |
| 4950                     | Turkey  | 2016 | MK989620.1    |
| 4945                     | Turkey  | 2016 | MK989621.1    |
| U1                       | Turkey  | 2016 | MK989622.1    |
| T5                       | Turkey  | 2018 | MK989623.1    |
| S8                       | Turkey  | 2017 | MK989624.1    |
| Mebus                    | USA     | 1972 | U00735.2      |
| R-AH65                   | USA     | 2000 | EF424617.1    |
| V270                     | Germany | 1983 | EF193075.1    |
| AH187                    | USA     | 2000 | FJ938065.1    |
